# Supplementary material for: Nano-dynamic imaging: NanoSpacer as a low-cost optical method for real-time visualisation of nanoparticle disassembly and functionalisation
Source: Research Square preprint supplement (doi:10.21203/rs.3.rs-8389168/v1), 2026-01-22
Supplement: Supplementary file 1 [file ac658114f5394a856c687a03.docx]

**SUPPLEMENTARY VIDEOS**

Nano-dynamic imaging: NANOSPACER as a low-cost optical method for real-time visualization of nanoparticle disassembly and functionalization

Andrew George Baker a,b, Anna J. Edinger a, Adaobi Chike a, Andrew Te Water Naude a, Adrian Pui Ting Ho a, Laia Hernandez-Marco c, Farzin Chougani c, John F. McGinty a, Cheng Wei a, Heather F. Greer d, D. Ian Wilson a, Ljiljana Fruk a, *, Oliver Vanderpoorten c, *

Supplementary Video 1 is available at:

<https://www.dropbox.com/scl/fi/wj00aeoemovrvkapzf8e0/Video_1_PS-Nanobeads_44_100_200_nm_-20hz_sb10um.avi?rlkey=1gc9nwbkqm7cph79tas4v3yyy&dl=0>

Video 2:

<https://www.dropbox.com/scl/fi/3k10686vif769kth6ojy8/Video_2_5_50x_9Hz_rgb.avi?rlkey=46wk4wzmv31ckp315wi1nz4o3&dl=0>

Video 3:

<https://www.dropbox.com/scl/fi/h5u6ngq4rpnewifrtu0ua/Video_3_NJ_spherical_after_ethanol_50x_rgb_20hz_sb_20um.avi?rlkey=bcu41z3qlecbrf99o9ci0e8ii&dl=0>

Video 4:

<https://www.dropbox.com/scl/fi/lkalqkdmi5jjuqki9p6m8/Video_4_Figure_3_NJ_Fibrils_50x_15hz_sb20um_video.avi?rlkey=we2prdig6lvk92xlga3fmlsrd&dl=0>

Video 5:

<https://www.dropbox.com/scl/fi/3g2e5cutho2r2ofafwlfn/Video_5_Figure_3_NanoJagg_NanoRod_Bulk_Reflection.mp4?rlkey=eo49yo7om5pq8lu3su98xu35u&dl=0>

Video 6:

<https://www.dropbox.com/scl/fi/0ztgfv3pdzwnhth5vta6r/Video_6_Microspacer_1_1_azide_ethanol_interaction_comparison_32Hz_sb50um.avi?rlkey=uzxjg5y9tn48cdam3vuvuomxw&dl=0>

Video 7:

<https://www.dropbox.com/scl/fi/qlcekiu7wsz2dlr4te5f2/Video_7_NS_edge_ethanol_impact-dissolving_rods_scalebar_20um.avi?rlkey=ng919cgmzezyap9h4zs6dgjwy&dl=0>

Video 8:

<https://www.dropbox.com/scl/fi/m54nf8xgivjziqazgo71o/Video_8_ethanol_50x_60hz_singlefibril-disassembly_sb_5um.avi?rlkey=u7324k5lehrewrizzfjh9ot2f&dl=0>

Video 9:

<https://www.dropbox.com/scl/fi/ehhs92qo2a61mqexwmrlu/Video_9_NJ_fibril_detail_50x_60hz_sb_5um.avi?rlkey=w2um93hnue9rwsbxcjnhgrsul&dl=0>

Video 10

<https://www.dropbox.com/scl/fi/ue551d3piq9x15mwhe662/Video_10_NJ_fibril_falling-apart_50x_60hz_scalebar_5um.avi?rlkey=ztxrsv3e5fat3iq6fhzye7888&dl=0>

Video 11:

<https://www.dropbox.com/scl/fi/b5twa791seppz7mdkep8l/Video_11_Figure-5-PDA_before_video_20hz_sb20um.avi?rlkey=rlmbh5pcshvb3z3mbrxxi06i2&dl=0>

Video 12:

<https://www.dropbox.com/scl/fi/6geirpjs1y586c0rtlfjc/Video_12_Binding_50x_20hz_pxs96nm_video_sb5um.avi?rlkey=ntp1d7ixv1fisxk7m6s7v0j76&dl=0>
